# Supplementary material
Source: publisher site journal article supplement (https://www.dovepress.com/article/389827)
Supplement: Supplementary file 1 [file get_supplementary_file.php]

**Appendix A: Sample interview guide**

**Study title: what are the experiences of adults living with chronic low back pain in Ethiopia?**

1. How would you describe in your own words what it means to live with chronic low back pain?

**Possible probing questions**:

- What is your experience with low back pain?
- What happens when your back is hurting? How would you describe it?
- How has the pain altered the way you view yourself as a person?
- How does your world change as a result of your pain?
- How has your outlook on life changed since having this pain?

1. How does your pain affect your daily life?

**Possible probing questions:**

- Think of a time when your back was hurting. Would you be able to describe that moment? What did you do in that situation?
- Did you have to modify any activities of daily living because of your pain? If so, how?

1. How does your pain affect your relationships with other people?

**Possible probing questions**:

- How would you describe the relationship with your partner and / or family since your pain begins?
- What does your relationship with your friends, colleagues, and neighbours look like since your pain started?

1. If your life changed as a result of your pain, can you tell me a story about this change?
2. Have you used or currently using any strategy to control your pain?

**Possible probing questions:**

- On a daily basis, how would you manage your pain?
- Where did your management strategies come from? Did you come-up with them yourself? A therapist? A friend or family? How did it work for you?

1. Is there anything you would like to share with me about your back pain that we have not yet discussed?

**Appendix B: Examples of excerpts from our reflective journal**

| - In my PT education and training, I have learned that people with pain experience a range of physical dysfunction and disruptions in their social life. However, contrary to my knowledge and understanding of pain, I learned that this participant didn’t talk about her suffering. Instead, she discussed how her back pain is why she has a strong social connection with her neighbors and others in the community (participant 08). - I find it very challenging to interview and collect data from the participants when I see them struggling with pain. I often stop the interview and give them a break if they want to get up and move around. I feel guilty when I sit in front of them and ask them about their pain experience but do nothing for them in return. Yes- I often ask them if they would like to reschedule our interview or talk to their healthcare provider for pain management. It is a real struggle to balance my researcher and clinician roles. I always ask myself this question: even if I try my best to separate my clinician and researcher roles during the interview, is it sufficient to sympathize with the participants and let them go at the end of the interview? - Prior to the beginning of the interview, he (participant 08) told me that he could not sit for more than 20 minutes due to his back pain. I assured him we could stop the interview anytime if he wanted to get up and move around. I also told him we could reschedule our interview. Forty minutes into our interview, I saw him frequently shifting his sitting positions. I see that he is in pain. I told him we could take a break. But he insisted we continue the interview. The interview took about an hour, and I was amazed that he didn’t get out of his chair even for a second until after the interview. - This morning, the nurse from medical OPD called and told me someone with low back pain is interested in participating in this research. He is a farmer from a small rural village. I met him in the waiting area of the OPD. I introduced myself and explained the purpose of my study. I asked him if he was interested to participate in this study. He agreed to participate and told me he would sit for the interview after his doctor’s appointment. He entered the doctor’s office and came out after 10 minutes. He is already disappointed. He told me that the doctor didn’t give him a painkiller for his pain. Instead, he referred him to physiotherapy department, which is five to six minutes walk from the OPD. According to his plan, he would get painkillers and return to the village on the same day. But the doctor told him he should see a physiotherapist who would give him some exercises for his back pain. I can see the frustration on his face. He said, “I should go now. My village is far, and I must go now. I am here to medicine for my pain, but they are not giving me any medicine.” He declined to be interviewed. I told him it is okay, and he can go. I felt sad that he didn’t get what he came for. I know that the priority of people with pain who go to the health center is to have relief from their pain, not to participate in research. |
| --- |

**Appendix C: Sub-themes and participants quotes**

| **The lived experience of people with CLBP in Ethiopia** | |
| --- | --- |
| **Sub-themes** | **Quotations from participants with CLBP** |
| Loss of mobility means ‘being disabled’ | “I can’t walk to the church. Also, when you go to the church, you have to stand and pray. I cannot do that-I cannot sit or stand for long time. So, I go to the church less...my pain has impacted me in that sense.” (Asnaku, 32 years old woman) |
| Psychological impact- a struggle to maintain a ‘valued self’ | “I used to push and move a tank full of water around alone... I used to wash lots of clothes without any problem. Now I feel hollow and empty. I never expected that this would happen to me.” (Asnaku, 32-year-old woman. |
| Misunderstood and judged | “It is very difficult. You know if people see you at church but realized that you haven’t been to their funeral, they may not be happy. It is better to have other illnesses that can be visible to others, so that they can see it.” (Tadese, 37-year-old-man). |
| You are alone with your pain and suffer in silence | “I have friends who always invite me to go on a trip with them...but I make excuses not to tell them about my situation. I share about my back problem only with those who I trust and know them very well.” (Tadese, 37-year-old-man). |
| Self-diagnosing | “I brought this [back pain] to myself...it is my fault. You know you must live according to your ability. If you work harder than your ability, you bring this to yourself.” (Tizita-40-year-old, man)  “It was sudden...you know what happens when you take off your clothes in a cold? It is just like that that when I first had the pain. It [a wind/ cold weather] hit me at a workplace.” (Askal-42-year-old, woman)  “We always say ‘we have pain in our back’ but we do not know what causes it. They first said my joints are dry. The second time they saw me with an ultrasound, they said it is thinning of the bones. Recently I had MRI and they said it is slipping of something....” (Adanech-46-year-old, woman) |
| Societal influence on the perception of people with CLBP on the cause of the pain | “There are so many people with back pain who say ‘vegetable oil is bad’...it affected many people. I personally do not eat that. I buy a different kind of oil. But you don’t know-may be the merchants are secretly mixing that oil [vegetable oil] with the one I am using. They even say it could be from the fertilizers the farmers use to grow their crop.” (Girma-55-year-old, man) |
| Searching for the right doctor | “One of the doctors scared me that I am in danger and I must have surgery for my back problem. He even asked me whether I have children or not, as if I will not be able to have kids after surgery. It was worrying. I never went back to see him again.” (Tadese-37-year-old, man)  “Some of them do not take you seriously...they just tell you ‘you would get better’ without doing something for you. You sense that they are tired of seeing you.” (Kebede-66-year-old, man) |
| Rest, avoid activities, or protect the back | “I do not lift heavy things. If I need to lift anything, I do so by correcting my back. The only time I bend my body forward and do something is when I wash clothes. Even then, I put a laundry bucket on a table to wash my clothes.” (Bekelech-24-year-old, woman)  “If I stop any activity, I feel like I am cured from my pain. I feel like I am completely cured when I lay in bed the whole day. When I lay down on my back, the pain goes away gradually. I can even stay laying on my back the whole night.” (Pt 4: Asnaku-32 years-old, female) |
| Taking pain killers | “I take my medicine. The doctors gave me pain killers and told me that if take it [pain killer], my pain would disappear. I take it and my pain would be fine for a week or so.” (Birtukan- 19-year-old, woman) |
| Cultivating inner strength and adapting to pain | “I thought I would slowly get better. It isn’t a fracture. Isn’t it? Had it been a fracture, I would not have been walking around. Since I didn’t think it is a fracture, I thought the pain would slowly go away on its own and I tolerated it. That is why I did not seek a treatment until this time.” (Asnaku-32 years-old, woman) |
| Submit to God, pray, and ask for mercy | “You know I went to that women [traditional healer] believing that she would cure me, let alone the holy water. I go and seek treatment wherever I think will cure me including the holy water.” (Tadese-37-year-old, man)  “This is God’s gift. What else can you do other than accepting it? I pray to him to send me his good will and let me be like my friends.” (Adanech-46-year-old, woman) |
| Maintaining positive social connection | “Talking to people is good- you forget about your pain. That is why I feel ok during the daytime. The problem is during the nighttime because I am alone in the night.” (Girma-55-year-old, man)  “If they [neighbors] come to help you when you are in pain, it is a testimony that people care about you and you are not alone. It is so significant.” (Adanech-46-year-old, woman)  “When I stay at home, I do nothing but listen to my pain. But if I stay the whole day with my colleagues at work, I do not listen to my pain. They do not even want me to do anything-they would let me rest.” (Asnaku, 32 years old woman) |
